# Supplementary material for: A Stable Fe-Zn Modified Sludge-Derived Biochar for Diuron Removal: Kinetics, Isotherms, Mechanism, and Practical Research
Source: MDPI journal article supplement (doi:10.3390/molecules28062868), 2023-03-22
Supplement: s1 [file s1]

# **A stable Fe-Zn Modified Sludge-Derived Biochar for Diuron Removal: Kinetics, Isotherms, Mechanism, and Practical Research**

Yucan Liu<sup>1</sup>, Xianguo Ji<sup>1</sup>, Ying Wang<sup>1</sup>, Yan Zhang<sup>1</sup>, Yanxiang Zhang<sup>2\*</sup>, Wei Li<sup>3</sup>, Jiang Yuan<sup>4</sup>, Dong Ma<sup>5</sup>, Hongwei Sun<sup>2</sup>, Jinming Duan<sup>6</sup>

<sup>1</sup> *School of Civil Engineering, Yantai University, Yantai 264005, China*

<sup>2</sup> *School of Environmental and Materials Engineering, Yantai University, Yantai 264005, China*

<sup>3</sup> *Key Laboratory of Northwest Water Resources, Environment and Ecology, MOE, Xi'an University of Architecture and Technology, Xi'an 710055 China*

<sup>4</sup> *College of Environmental Science and Engineering, Tongji University, Shanghai 200092, China*

<sup>5</sup> *Rural Environmental Engineering Center of Qingdao, College of Resource and Environment, Qingdao Agricultural University, Qingdao 266109, China*

<sup>6</sup> *Centre for Water Management and Reuse, University of South Australia, Mawson Lakes Campus, SA 5095, Australia*

**Corresponding author:**

E-mail: yanxiangzhang@ytu.edu.cn (Yanxiang Zhang); phone: 86-15699613180

## Table of Contents

|                                                                                                                                                    |    |
|----------------------------------------------------------------------------------------------------------------------------------------------------|----|
| <b>Text S1</b> Method for the detection of diuron. ....                                                                                            | 3  |
| <b>Figure S1</b> The N <sub>2</sub> adsorption–desorption curves of SDBC600 and SDMBC600.....                                                      | 4  |
| <b>Figure S2</b> Characterization of SDMBC600 after adsorption of diuron from water: (a) SEM image; (b) EDS; (c) FTIR spectrum. ....               | 5  |
| <b>Figure S3</b> The leaching concentrations of Fe and Zn of SDMBC600 at different solution pH conditions ( $t = 360$ min).....                    | 6  |
| <b>Figure S4</b> The regeneration efficiency of SDMBC600 by ultrasonic–ethanol co–treatment (10 mg/L diuron, 0.075 g SDMBC600, $t = 360$ min)..... | 7  |
| <b>Figure S5.</b> The ratio of FeCl <sub>3</sub> , ZnCl <sub>2</sub> , and SDBC600 on the adsorption of diuron by modified biochar. ....           | 8  |
| <b>Figure S6</b> Effect of the second step pyrolysis temperature on the adsorption of diuron by modified biochar. ....                             | 9  |
| <b>Table S1</b> Surface area and pore parameters of SDBC600 and SDMBC600.....                                                                      | 10 |
| <b>Table S2</b> Elemental composition and atomic number ratio of the biochars.....                                                                 | 11 |
| <b>Table S3</b> Water quality index of the real water samples. ....                                                                                | 12 |
| <b>Table S4</b> Details of the equations, kinetic models, isotherm models, and thermodynamics model used in this study. ....                       | 13 |

**Text S1** Method for the detection of diuron.

UPLC–ESI–MS/MS was used as a determination and analysis instrument, and Masslynx 4.1 was used for real-time control, data acquisition, and processing. ACQUITY™ UPLC BEH C18 column (2.1 mm × 50 mm × 1.7 μm) was used for chromatographic separation. The mobile phase consisted of MeOH (A) and UPW (B) at a flow rate of 0.2 mL/min and an injection volume of 10 μL. The column temperature was maintained at 35 °C. The injection syringe was rinsed automatically after each injection to eliminate interference between injections. Each rinse cycle used 800 μL of weak wash solvent (UPW/MeOH, 90:10, v:v) and 400 μL of strong wash solvent (UPW/MeOH, 10:90, v:v). The elution gradient of diuron detection were as follows: 0–1 min, 10% A; 1–5.5 min, 10%–70% A; 5.5–6.5 min, 70%–100% A; 6.5–7 min, 100% A; 7.0–7.1 min, 100%–10% A; 7.1–10 min, 10% A. A total acquisition time of one run analysis was 10 min.

Full scan data were acquired from  $m/z$  50 to 400 at an acquisition rate of 100 ms/scan in both positive electrospray ionization (ESI+) mode and negative electrospray ionization (ESI–) mode. In order to improve the accuracy of the detection,  $m/z$  232.8 was used for the quantitative analysis of diuron in the selected ion monitoring (SIM, ESI–). The capillary voltage was 3.0 kV and the cone voltage was 34 V. The desolvation and source temperature were 350 °C and 110 °C, respectively. The desolvation gas and cone gas were nitrogen (99.999%) with flow rates of 500 L/h and 50 L/h, respectively..

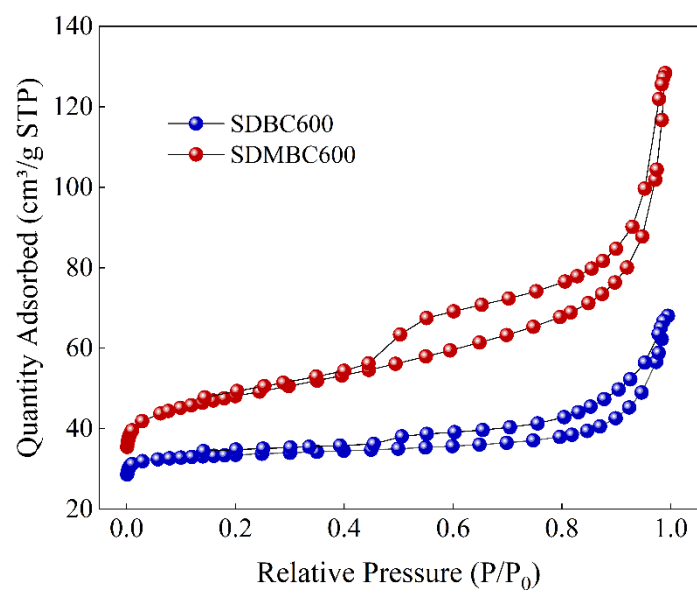

**Figure S1** The N<sub>2</sub> adsorption–desorption curves of SDBC600 and SDMBC600.

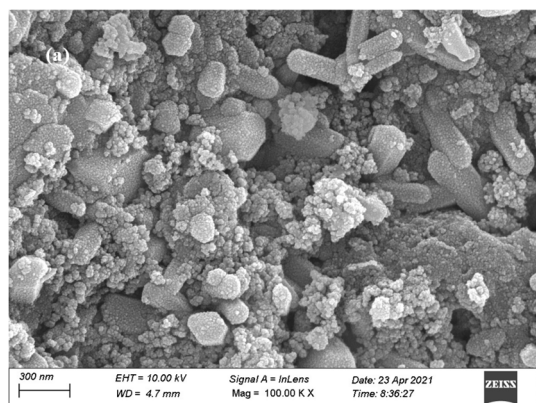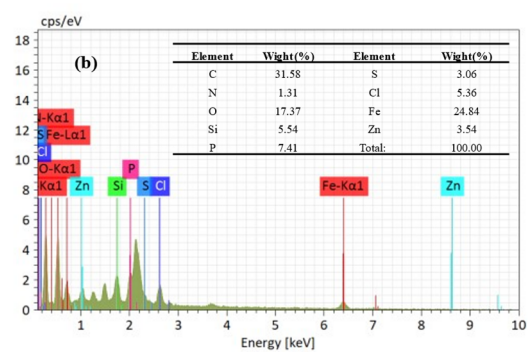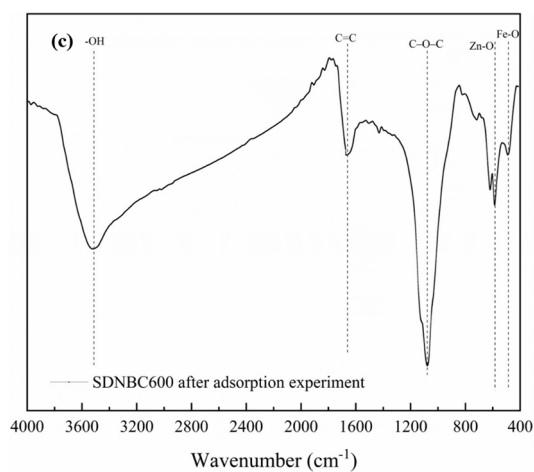

**Figure S2** Characterization of SDMBC600 after adsorption of diuron from water: (a) SEM image; (b) EDS; (c) FTIR spectrum.

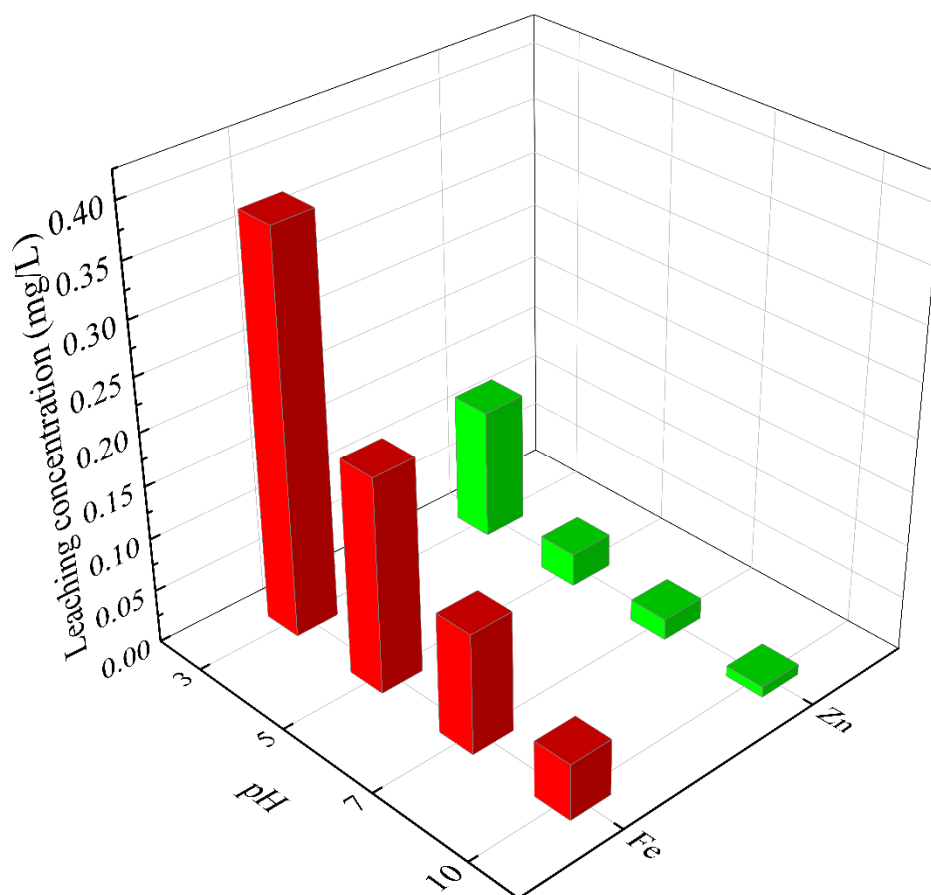

**Figure S3** The leaching concentrations of Fe and Zn of SDMBC600 at different solution pH conditions ( $t = 360$  min).

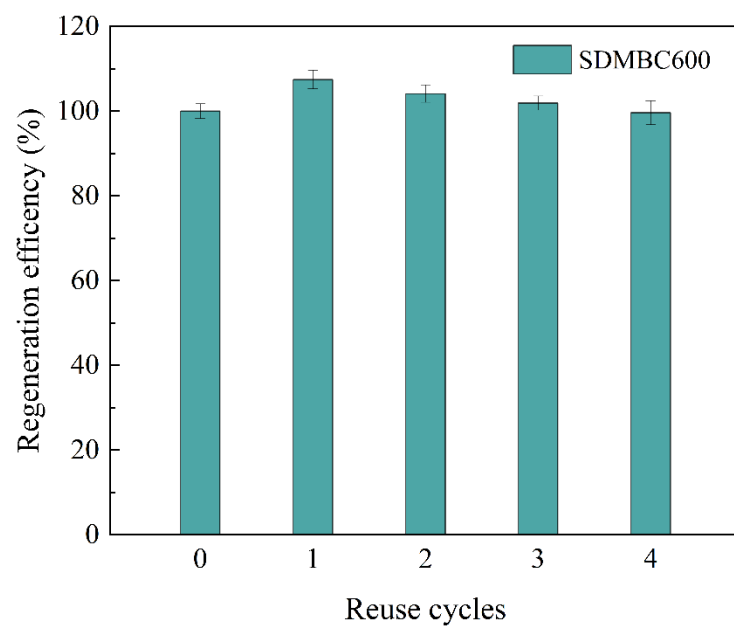

**Figure S4** The regeneration efficiency of SDMBC600 by ultrasonic–ethanol co–treatment (10 mg/L diuron, 0.075 g SDMBC600,  $t = 360$  min).

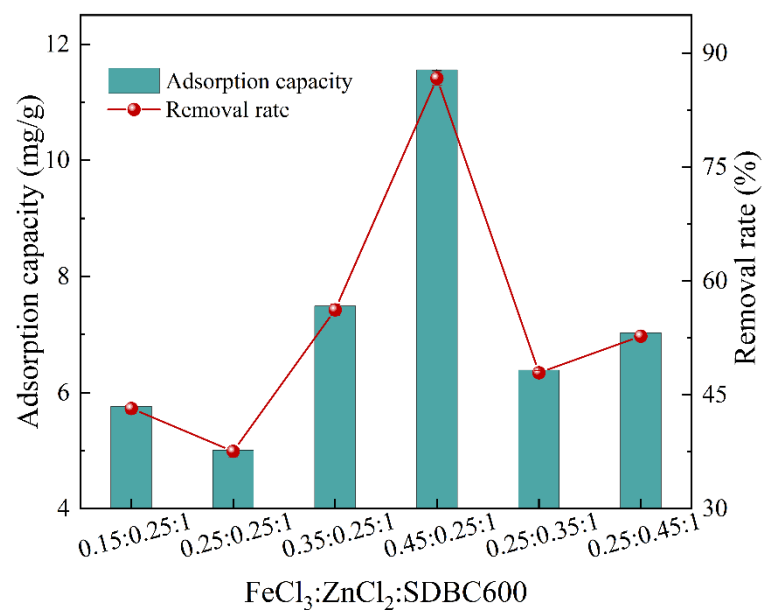

**Figure S5.** The ratio of FeCl<sub>3</sub>, ZnCl<sub>2</sub>, and SDBC600 on the adsorption of diuron by modified biochar.



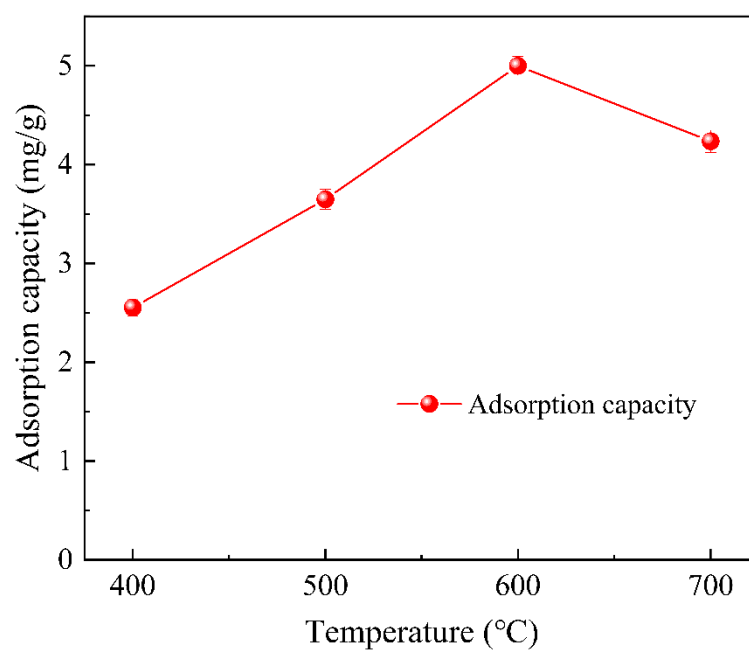

**Figure S6** Effect of the second step pyrolysis temperature on the adsorption of diuron by modified biochar.

**Table S1** Surface area and pore parameters of SDBC600 and SDMBC600.

| Biochar  | BET surface<br>area (m <sup>2</sup> /g) | Langmuir surface<br>area (m <sup>2</sup> /g) | $V_{\text{total}}$<br>(cm <sup>3</sup> /g) | $V_{\text{micro}}$<br>(cm <sup>3</sup> /g) | Average pore<br>diameter (nm) |
|----------|-----------------------------------------|----------------------------------------------|--------------------------------------------|--------------------------------------------|-------------------------------|
| SDBC600  | 28.7                                    | 59.8                                         | 0.0382                                     | 0.00671                                    | 5.33                          |
| SDMBC600 | 79.2                                    | 204                                          | 0.0985                                     | 0.00837                                    | 4.97                          |

**Table S2** Elemental composition and atomic number ratio of the biochars.

| Name     | Elemental composition (%) |        |       |       |        | Atomic number ratio (%) |       |         |
|----------|---------------------------|--------|-------|-------|--------|-------------------------|-------|---------|
|          | H                         | C      | N     | S     | O      | H/C                     | O/C   | (N+O)/C |
| SDBC600  | 0.859                     | 22.980 | 2.880 | 1.743 | 20.911 | 0.116                   | 0.910 | 1.035   |
| SDMBC600 | 1.072                     | 20.620 | 2.460 | 1.615 | 17.218 | 0.166                   | 0.852 | 0.974   |

**Table S3** Water quality index of the real water samples.

| Parameter                                                     | Samples 1         | Samples 2          | Samples 3          | Samples 4          |
|---------------------------------------------------------------|-------------------|--------------------|--------------------|--------------------|
| Diuron ( $\mu\text{g/L}$ )                                    | $0.11 \pm 0.001$  | $0.008 \pm 0.0001$ | $0.22 \pm 0.005$   | ND <sup>a</sup>    |
| Turbidity (NTU)                                               | $11.34 \pm 0.32$  | $10.22 \pm 0.18$   | $5.43 \pm 0.11$    | $0.14 \pm 0.003$   |
| pH                                                            | $7.35 \pm 0.18$   | $8.27 \pm 0.22$    | $8.18 \pm 0.32$    | $7.94 \pm 0.31$    |
| TOC (mg/L)                                                    | $11.14 \pm 0.35$  | $4.86 \pm 0.13$    | $13.49 \pm 0.75$   | $1.24 \pm 0.09$    |
| TC (mg/L)                                                     | $33.89 \pm 1.23$  | $32.87 \pm 1.11$   | $53.71 \pm 2.13$   | $35.71 \pm 1.52$   |
| IC (mg/L)                                                     | $22.75 \pm 1.03$  | $28.01 \pm 1.08$   | $40.36 \pm 2.31$   | $34.47 \pm 1.75$   |
| UV <sub>254</sub> (cm <sup>-1</sup> )                         | $0.18 \pm 0.09$   | $0.086 \pm 0.001$  | $0.19 \pm 0.085$   | $0.02 \pm 0.003$   |
| NH <sub>3</sub> -N (mg/L)                                     | $1.835 \pm 0.07$  | $0.065 \pm 0.001$  | $0.064 \pm 0.003$  | $0.003 \pm 0.0001$ |
| Nitrate Nitrogen (mg/L)                                       | $0.38 \pm 0.005$  | $2.31 \pm 0.12$    | $6.65 \pm 0.24$    | $0.98 \pm 0.08$    |
| Nitrite Nitrogen (mg/L)                                       | $0.26 \pm 0.002$  | $0.008 \pm 0.0001$ | $0.005 \pm 0.0001$ | $0.005 \pm 0.0003$ |
| TN (mg/L)                                                     | $4.27 \pm 0.84$   | $2.95 \pm 0.39$    | $7.16 \pm 0.99$    | $0.98 \pm 0.09$    |
| Phosphate (mg/L)                                              | $0.160 \pm 0.03$  | $0.103 \pm 0.02$   | $0.294 \pm 0.06$   | $0.014 \pm 0.001$  |
| TP (mg/L)                                                     | $0.27 \pm 0.08$   | $1.034 \pm 0.11$   | $0.34 \pm 0.009$   | $0.09 \pm 0.001$   |
| Chloride (mg/L)                                               | $279.20 \pm 3.23$ | $155.80 \pm 2.51$  | $213.50 \pm 3.15$  | $128.30 \pm 2.64$  |
| Sulfate (mg/L)                                                | $263.40 \pm 2.64$ | $195.41 \pm 1.94$  | $198.82 \pm 1.98$  | $113.20 \pm 1.67$  |
| Total Hardness<br>(Calculated by CaCO <sub>3</sub> ,<br>mg/L) | $213.51 \pm 3.42$ | $300.57 \pm 4.26$  | $232.51 \pm 3.21$  | $420.14 \pm 4.89$  |

<sup>a</sup> Not detected.

**Table S4** Details of the equations, kinetic models, isotherm models, and thermodynamics model used in this study.

| Name                | Equation                                              | Parameter                                                                                                                                                                                                                                                |
|---------------------|-------------------------------------------------------|----------------------------------------------------------------------------------------------------------------------------------------------------------------------------------------------------------------------------------------------------------|
| Adsorption capacity | $q_e = \frac{C_0 - C_e}{m} V$                         | $q_e$ was the equilibrium adsorption capacity (mg/g); $C_0$ was the initial concentration of diuron (mg/L); $C_e$ was the equilibrium residual concentrations of diuron (mg/L); $V$ was the total volume of the solution (L); $m$ was adsorbent mass (g) |
| Removal rate        | $R_e = \frac{C_0 - C_e}{C_0} \times 100\%$            | $R_e$ was the removal rate (%); $C_0$ was the initial concentration of diuron (mg/L); $C_e$ was the equilibrium residual concentrations of diuron (mg/L).                                                                                                |
| Langmuir            | $q_e = \frac{q_m K_L \rho_e}{1 + K_L \rho_e}$         | $q_e$ was the equilibrium adsorption capacity (mg/g); $\rho_e$ was equilibrium solution concentration (mg/L); $q_m$ was the maximum adsorption capacity (mg/g); $K_L$ was Langmuir parameter                                                             |
| Freundlich          | $q_e = K_f \rho_e^{\frac{1}{n}}$                      | $q_e$ was the equilibrium adsorption capacity (mg/g); $K_f$ and $n$ were Freundlich parameter; $\rho_e$ was equilibrium solution concentration (mg/L).                                                                                                   |
| Sips                | $q_e = \frac{q_m (k_s \rho_e)^m}{1 + (k_s \rho_e)^m}$ | $q_e$ was the equilibrium adsorption capacity (mg/g); $q_m$ was the maximum adsorption capacity (mg/g); $k_s$ and $\rho_e$ were Sips model parameter; $m$ was the empirical parameter of Sips.                                                           |
| Pseudo-first-order  | $q_t = q_e (1 - e^{-k_1 t})$                          | $q_t$ was the adsorption capacities (mg/g) at $t$ time (min), $q_e$ was the adsorption capacities (mg/g) at equilibrium time (min); $k_1$ was the reaction rate constant of the Pseudo-first-order kinetic equation                                      |
| Pseudo-second-order | $q_t = \frac{q_e^2 k_2 t}{1 + q_e k_2 t}$             | $q_t$ was the adsorption capacities (mg/g) at $t$ time (min), $q_e$ was the adsorption capacities (mg/g) at equilibrium time (min); $k_2$ was the reaction rate constant of the Pseudo-second-order kinetic equation                                     |
| Elovich             | $q_t = \frac{\ln(1 + \alpha \beta t)}{\beta}$         | $q_t$ was the adsorption capacities (mg/g) at $t$ time (min), $q_e$ was the adsorption capacities (mg/g) at equilibrium time (min); $\alpha$ and $\beta$ were Elovich parameter                                                                          |
